# Supplementary material
Source: PubMed Central journal article supplement (PMC10163861)
Supplement: 40279_2023_1846_MOESM2_ESM.pdf [file 40279_2023_1846_MOESM2_ESM.pdf]

## Supplementary Figures for:

### Metabolic Signatures of Performance in Elite World Tour Professional Cyclists

Travis Nemkov<sup>1\*</sup>, Francesca Cendali<sup>1</sup>, Davide Stefanoni<sup>1</sup>, Janel L. Martinez<sup>2</sup>, Kirk C. Hansen<sup>1</sup>,  
Iñigo San-Millán<sup>2,3</sup>, Angelo D'Alessandro<sup>1\*</sup>

<sup>1</sup>University of Colorado Anschutz Medical Campus, Department of Biochemistry and Molecular Genetics, Aurora, CO, USA

<sup>2</sup>University of Colorado Anschutz Medical Campus, Department of Medicine, Division of Endocrinology, Metabolism and Diabetes. Aurora, CO, USA

<sup>3</sup>University of Colorado, Colorado Springs, Department of Human Physiology and Nutrition, Colorado Springs, CO, USA

#### Correspondence to:

Travis Nemkov, PhD  
Department of Biochemistry and Molecular Genetics  
University of Colorado Anschutz Medical Campus  
12801 East 17th Ave L18-9122., Aurora, CO 80045  
Phone # 303-724-0096

E-mail: [travis.nemkov@cuanschutz.edu](mailto:travis.nemkov@cuanschutz.edu)

Angelo D'Alessandro, PhD  
Department of Biochemistry and Molecular Genetics  
University of Colorado Anschutz Medical Campus  
12801 East 17th Ave L18-9118., Aurora, CO 80045  
Phone # 303-724-0096  
E-mail: [angelo.dalessandro@cuanschutz.edu](mailto:angelo.dalessandro@cuanschutz.edu)

**Running title:** *Metabolomics in Elite Professional Cyclists*

|                                     |          |
|-------------------------------------|----------|
| <b>SUPPLEMENTARY FIGURES.....</b>   | <b>2</b> |
| <i>SUPPLEMENTARY FIGURE 1</i> ..... | <b>2</b> |
| <i>SUPPLEMENTARY FIGURE 2</i> ..... | <b>3</b> |
| <i>SUPPLEMENTARY FIGURE 2</i> ..... | <b>4</b> |

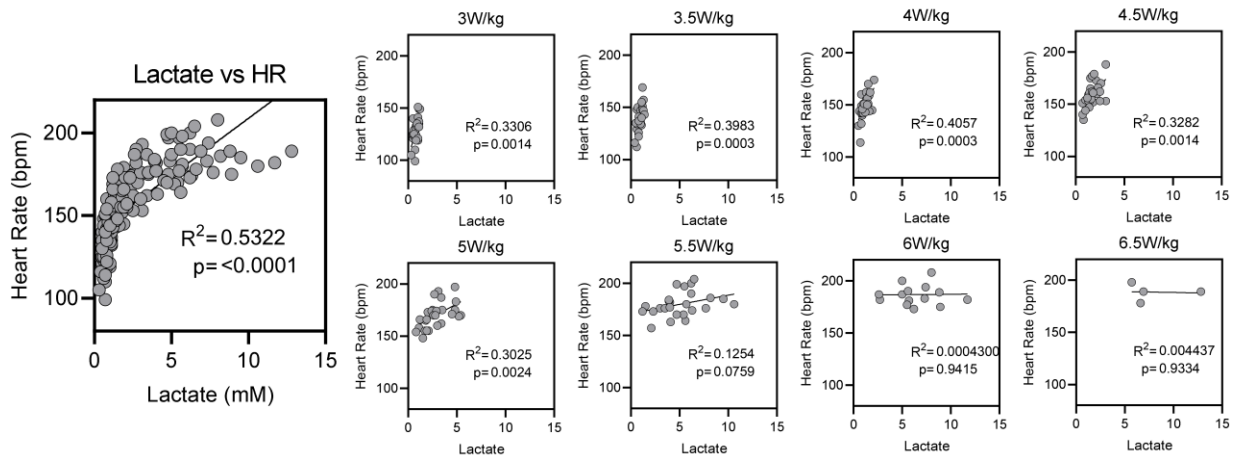

Supplemental Figure 1 Correlation between lactate and heart rate during the Maximum Physiology Test.

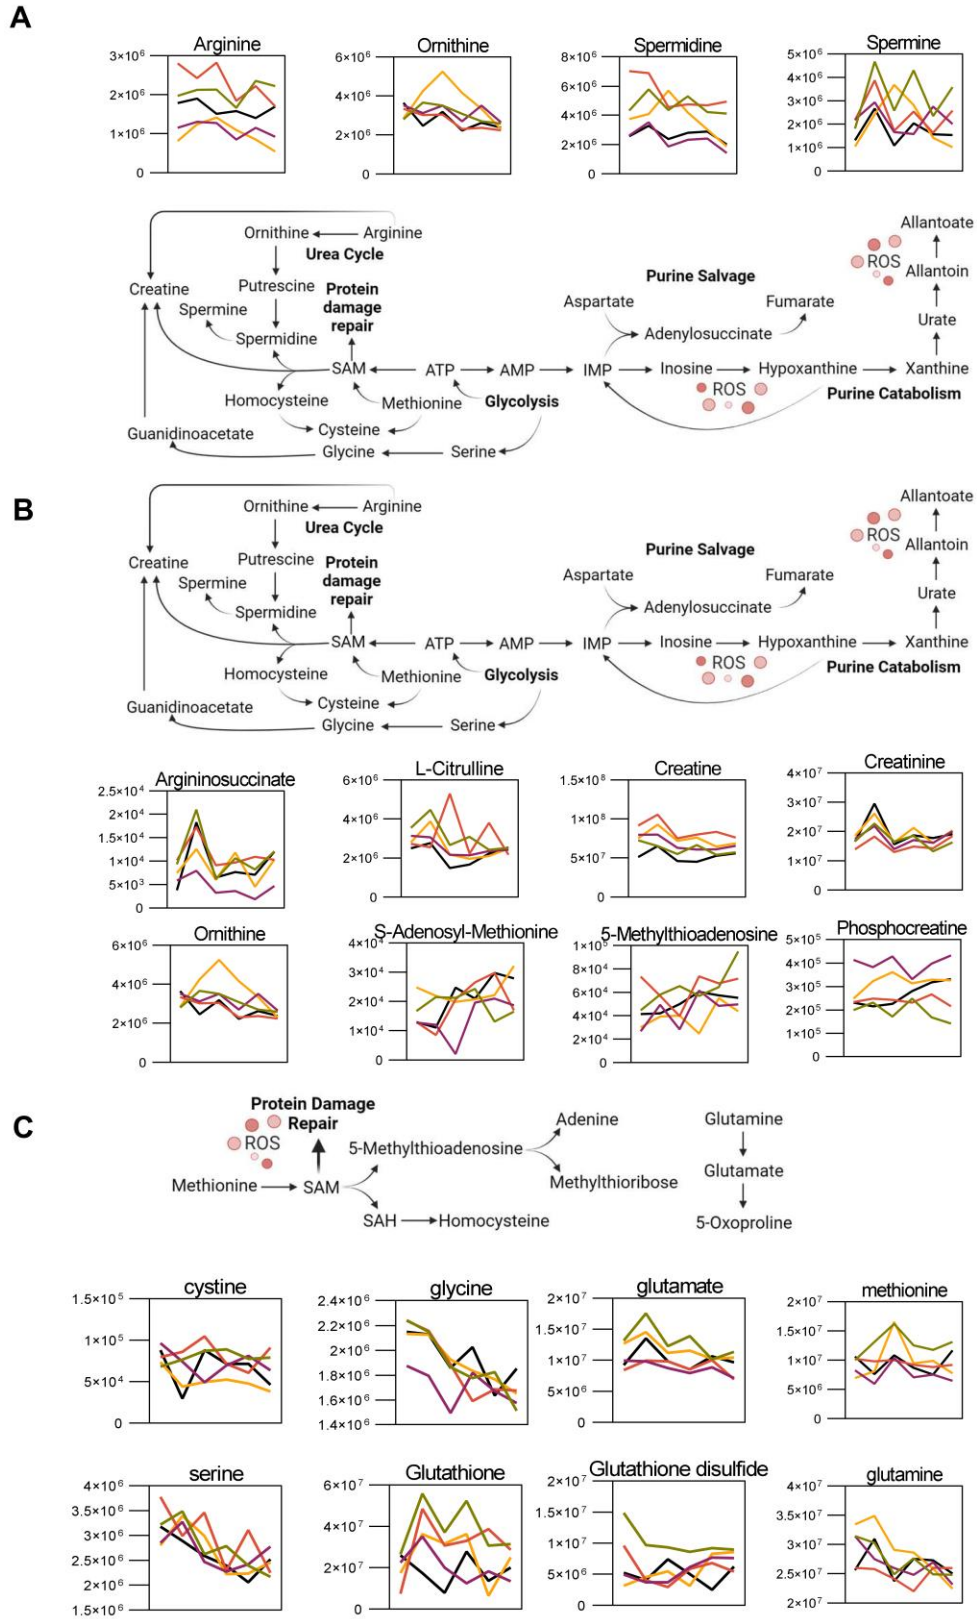

**Supplemental Figure 2 Individual Cyclist Analysis during a Multistage World Tour Race.** Longitudinal profiles during the course of the race for (A) nitrogen metabolism, (B) connection with purine salvage, and (C) redox metabolism and protein damage repair.

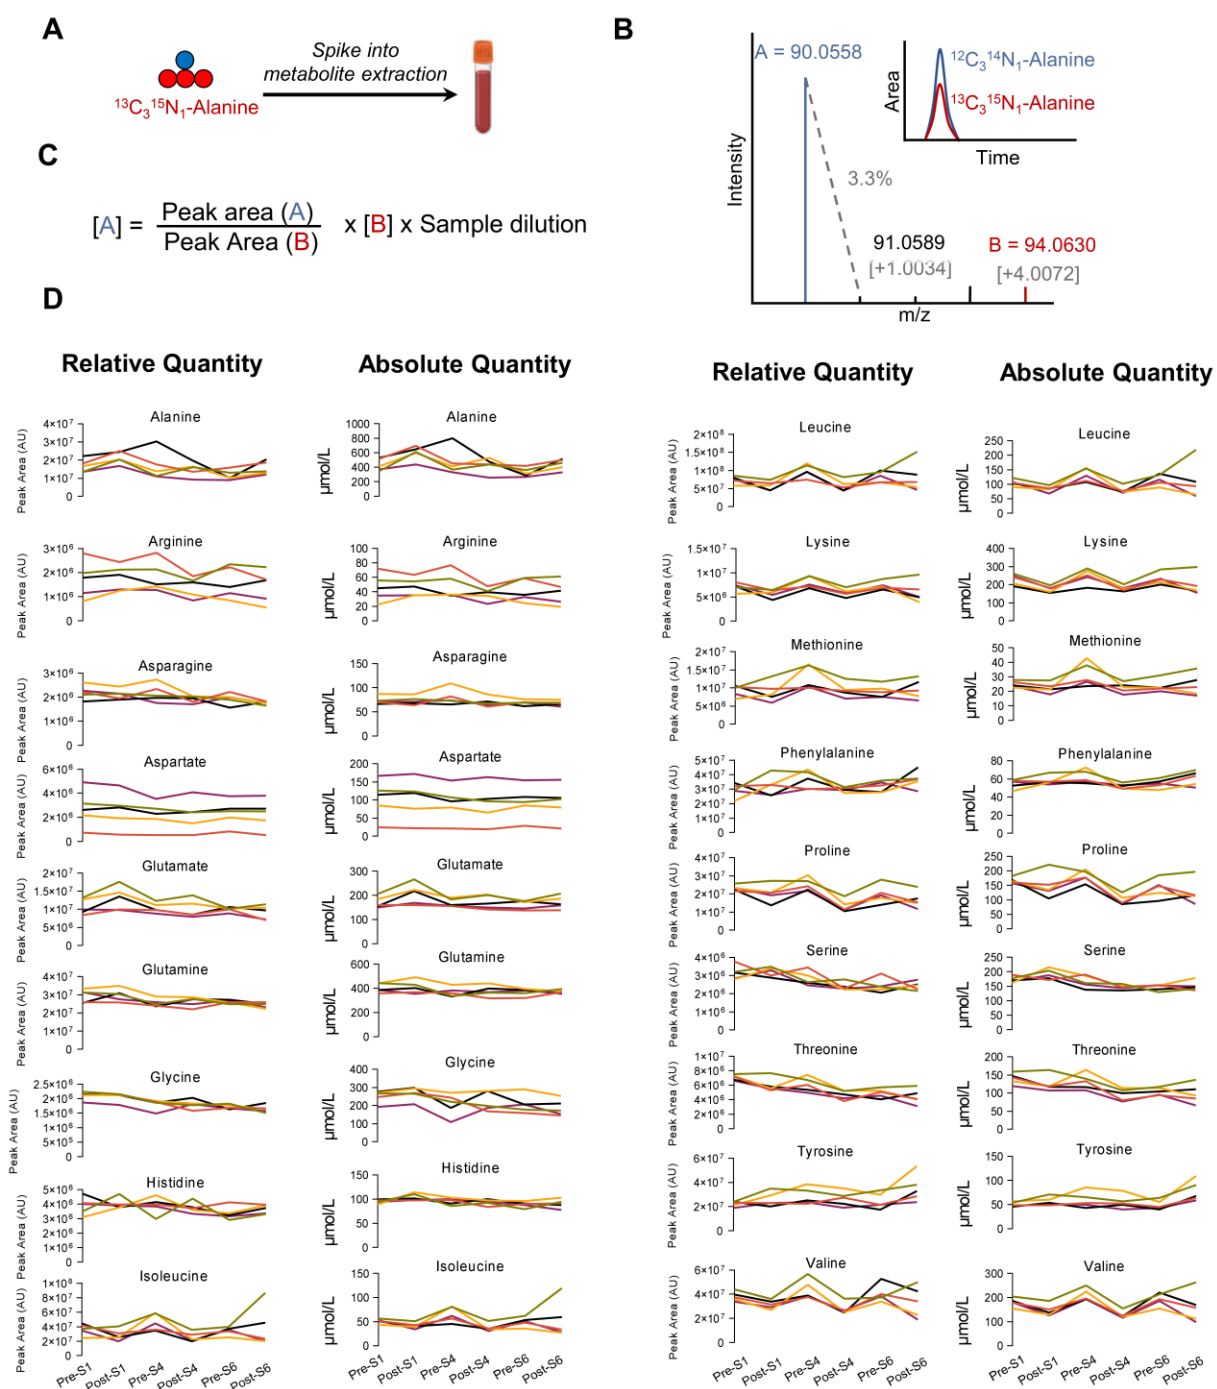

**Supplemental Figure 3 Absolute quantitation of amino acids against stable isotope-labeled internal standards.**

For hydrophilic molecule analysis, samples were extracted in presence of  $^{13}\text{C}^{15}\text{N}$ -amino acid cocktails, which were used as internal standards for quality control, as well as for quantitation of amino acids through determination of ratios of endogenous, unlabeled compounds vs internal heavy labeled isotopologues (B), according to the formula in C. Relative peak areas and absolute quantitative values ( $\mu\text{M}$ ) are displayed on the y axis in each side-by-side graph for all amino acids.
